# Supplementary material for: Pre-Crystallization of Nougat by Seeding with Cocoa Butter Crystals Enhances the Bloom Stability of Nougat Pralines
Source: MDPI journal article supplement (doi:10.3390/foods10051056), 2021-05-11
Supplement: s1 [file s1]

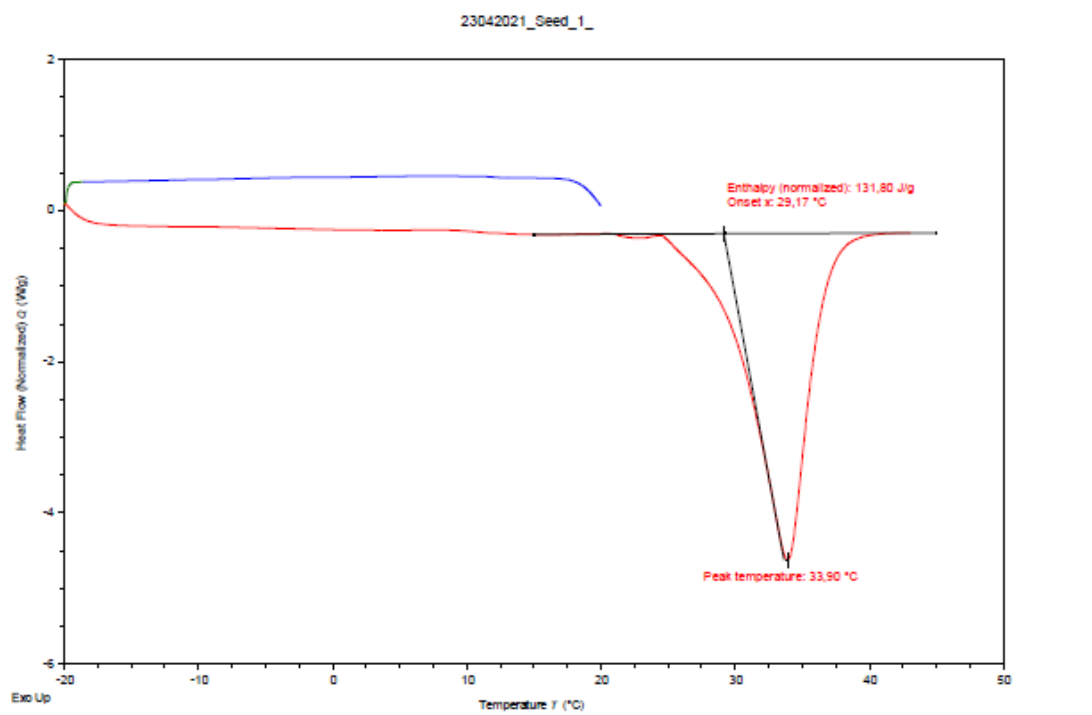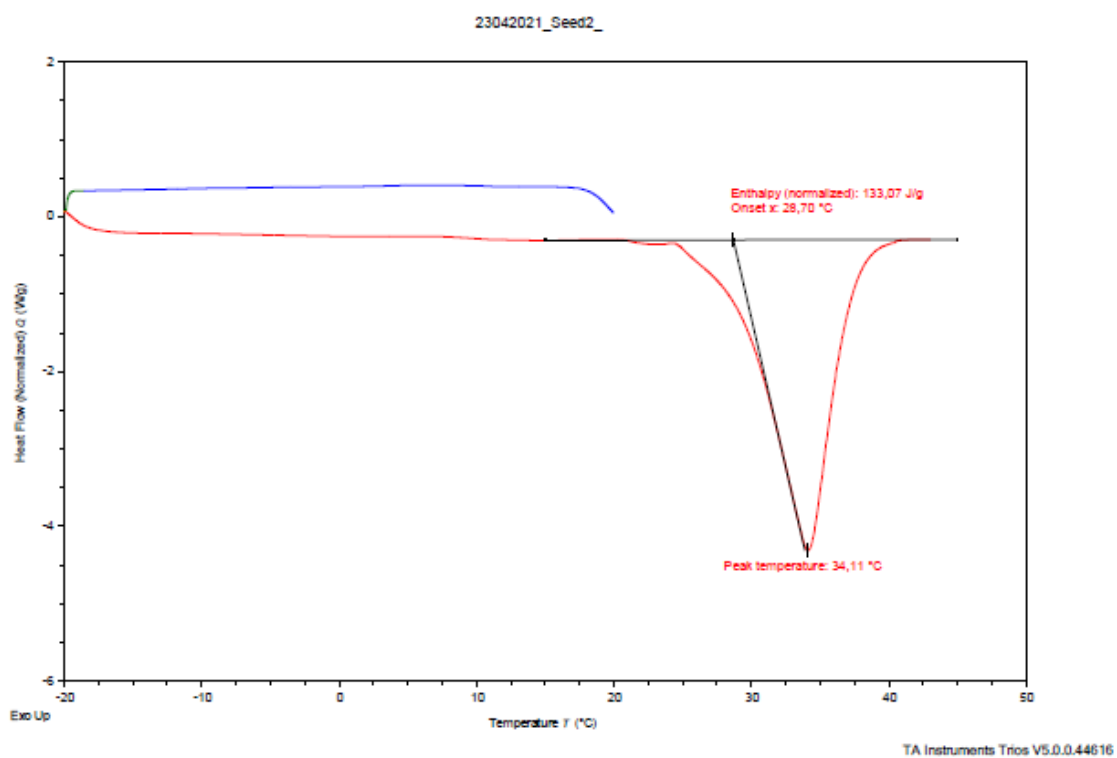

Figure S1: Melting curves (duplicate measurement) of the fV cocoa butter seed powder used in this study.

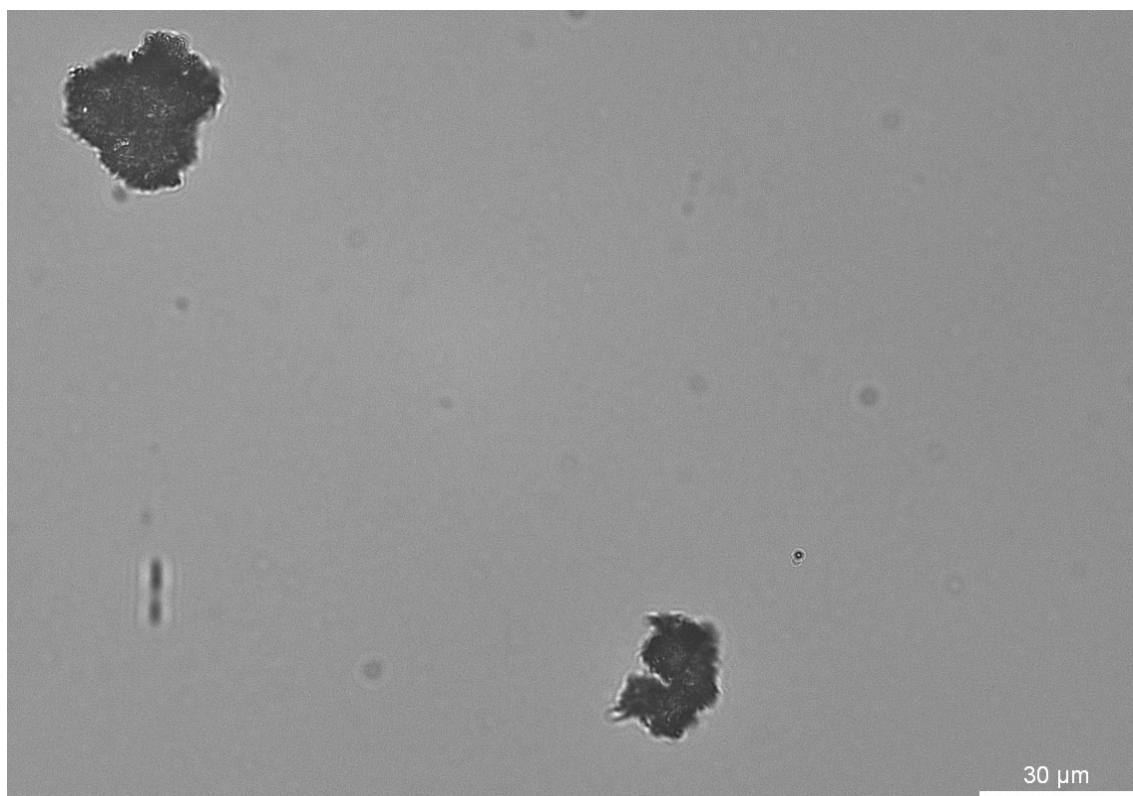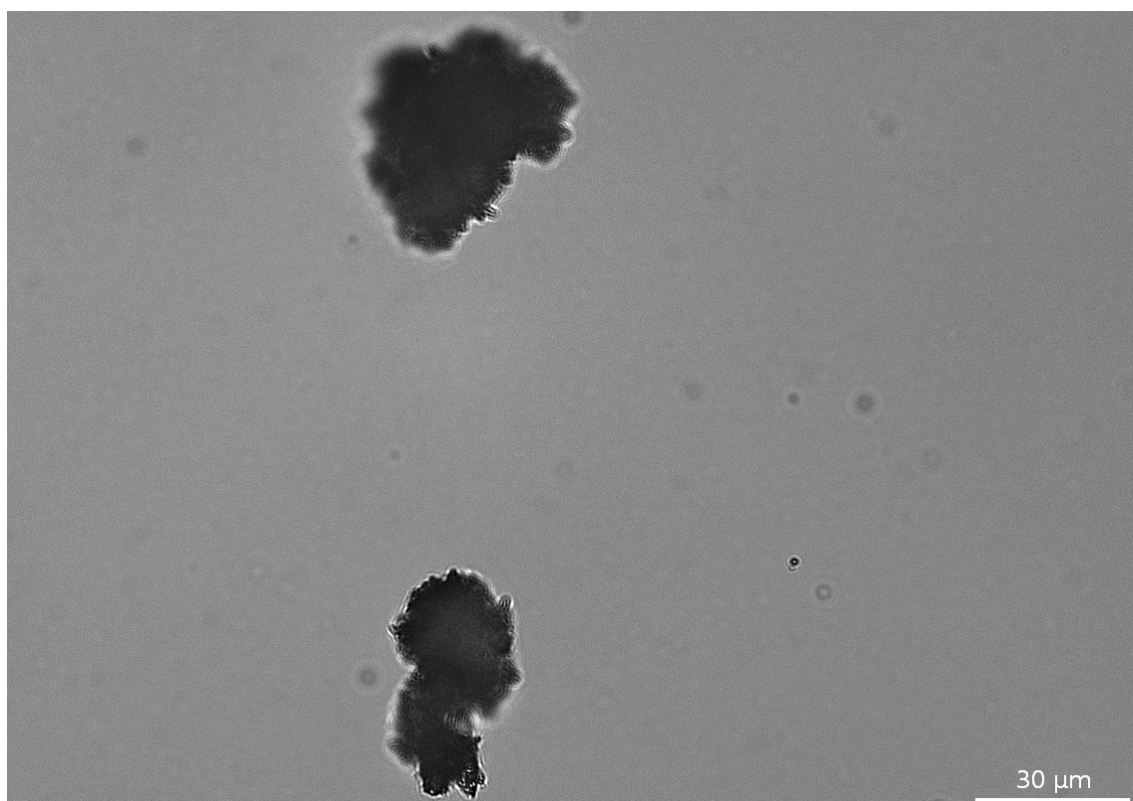

**Figure S2:** Light microscopy images of the  $\beta$ V cocoa butter seed powder used in this study.
